# Supplementary material for: BCAR4 induces antioestrogen resistance but sensitises breast cancer to lapatinib
Source: PubMed Central journal article supplement — Br J Cancer. 2012 Aug 14;107(6):947–55. doi: 10.1038/bjc.2012.351 (PMC3464772; doi:10.1038/bjc.2012.351), 2012-08-14
Supplement: bjc2012351x2.pdf [file bjc2012351x2.pdf]

|         |                                                    |            |        |   |
|---------|----------------------------------------------------|------------|--------|---|
| 9464    | FOXO1 (T24)/FOXO3 (T32)                            | CellSig    | 1:200  | R |
| 9331    | GSK-3a/B (S21/9)                                   | CellSig    | 1:100  | R |
| 9246    | IkappaB-alpha (S32/36)                             | CellSig    | 1:100  | M |
| 2386    | IRS-1 (S612)                                       | CellSig    | 1:200  | R |
| 3391    | c-Kit (Y719)                                       | CellSig    | 1:250  | R |
| 34-9400 | c-Kit (Y721)                                       | Invitrogen | 1:200  | R |
| 2741    | MARCKS (S152/156)                                  | CellSig    | 1:200  | R |
| 9121    | MEK1/2 (S217/221)                                  | CellSig    | 1:500  | R |
| 3126    | Met (Y1234/1235)                                   | CellSig    | 1:200  | R |
| 2971    | mTOR (S2448)                                       | CellSig    | 1:100  | R |
| 2974    | mTOR (S2481)                                       | CellSig    | 1:100  | R |
| 3031    | NF-kappaB p65 (S536)                               | CellSig    | 1:100  | R |
| 9211    | p38 MAPK (T180/Y182)                               | CellSig    | 1:100  | R |
| 9208    | p70 S6 Kinase (S371)                               | CellSig    | 1:50   | R |
| 9341    | p90RSK (S380)                                      | CellSig    | 1:400  | R |
| 4781    | PKA C (T197)                                       | CellSig    | 1:200  | M |
| 06-822  | PKC alpha (S657)                                   | Millipore  | 1:1000 | R |
| 9374    | PKC delta (T505)                                   | CellSig    | 1:50   | R |
| 9378    | PKC zeta/lambda (T410/403)                         | CellSig    | 1:50   | R |
| 44-1100 | PRAS40 (T246)                                      | Invitrogen | 1:1000 | R |
| 9551    | PTEN (S380)                                        | CellSig    | 1:500  | R |
| 4431    | A-Raf (S299)                                       | CellSig    | 1:100  | R |
| 2696    | B-Raf (S445)                                       | CellSig    | 1:50   | R |
| 9427    | C-Raf (S338)                                       | CellSig    | 1:200  | R |
| 3321    | Ras-GRF1 (S916)                                    | CellSig    | 1:50   | R |
| 9251    | SAPK/JNK (T183/Y185)                               | CellSig    | 1:200  | R |
| 07-206  | Shc (Y317)                                         | Millipore  | 1:200  | R |
| 2954    | Smac/Diablo                                        | CellSig    | 1:1000 | R |
| 3101    | SMAD2 (S465/467)                                   | CellSig    | 1:250  | R |
| 9134    | Stat3 (S727)                                       | CellSig    | 1:100  | R |
| 05-485  | Stat3 (Y705)                                       | Millipore  | 1:200  | R |
| 9351    | Stat5 (Y694)                                       | CellSig    | 1:50   | R |
| 9361    | Stat6 (Y641)                                       | CellSig    | 1:100  | R |
| 2478    | VEGFR 2 (Y1175)                                    | CellSig    | 1:50   | R |
|         |                                                    |            |        |   |
|         | Abbreviations: R: rabbit; M: mouse. Cell Signaling |            |        |   |
|         | Technology, Inc, Danvers, MA, USA.Millipore,       |            |        |   |

Billerica, MA, USA. BD biosciences, Franklin Lakes, NJ, USA. Invitrogen, Carlsbad, CA, USA. Dako Inc, Carpinteria, CA, USA

### Supplementary Table 2

Total, cleaved (cl) or phosphorylated protein expression in lapatinib-treated ZR-75-1-derived cell lines

Antibodies used are specified in Supplementary Table 1

Expression levels (AU, arbitrary units, average of triplicates) were normalised to total protein.

Values above 700 have a CV of less than 2% across the triplicates

Relative expression levels (R ) are relative to estradiol-treated ZR/vector cells

(E2), estradiol; (4-OHT), 4-hydroxytamoxifen. Cells treated without (0  $\mu$ M), or with 0.01  $\mu$ M or 0.1  $\mu$ M lapatinib for 17h.

| Sample Name                        | EIF4EBP1 |     | ABL1 T735 |     | ACC S79 |     | ADD   |     | AKT (S473) |       | AKT (T308) |     | PRKAA1 |      | PRKAB1 |     | BAX  |     |
|------------------------------------|----------|-----|-----------|-----|---------|-----|-------|-----|------------|-------|------------|-----|--------|------|--------|-----|------|-----|
|                                    | AU       | R   | AU        | R   | AU      | R   | AU    | R   | AU         | R     | AU         | R   | AU     | R    | AU     | R   | AU   | R   |
| ZR/vector (E2) 0 $\mu$ M           | 31257    | 1.0 | 3378      | 1.0 | 11464   | 1.0 | 8030  | 1.0 | 139        | 1.0   | 685        | 1.0 | 313    | 1.0  | 4016   | 1.0 | 2189 | 1.0 |
| ZR/vector (E2) 0.01 $\mu$ M        | 32209    | 1.0 | 3667      | 1.1 | 9443    | 0.8 | 8734  | 1.1 | 193        | 1.4   | 1732       | 2.5 | 583    | 1.9  | 4205   | 1.0 | 2128 | 1.0 |
| ZR/vector (E2) 0.1 $\mu$ M         | 30946    | 1.0 | 3572      | 1.1 | 8911    | 0.8 | 8103  | 1.0 | 9          | 0.1   | 1604       | 2.3 | 0      | 0.0  | 3502   | 0.9 | 1494 | 0.7 |
| ZR/BCAR4 (E2) 0 $\mu$ M            | 44802    | 1.4 | 4910      | 1.5 | 5541    | 0.5 | 12457 | 1.6 | 3816       | 27.5  | 1937       | 2.8 | 0      | 0.0  | 7080   | 1.8 | 1799 | 0.8 |
| ZR/BCAR4 (E2) 0.01 $\mu$ M         | 25591    | 0.8 | 4760      | 1.4 | 10077   | 0.9 | 5362  | 0.7 | 334        | 2.4   | 1672       | 2.4 | 0      | 0.0  | 3100   | 0.8 | 3072 | 1.4 |
| ZR/BCAR4 (E2) 0.1 $\mu$ M          | 37049    | 1.2 | 4452      | 1.3 | 10148   | 0.9 | 6884  | 0.9 | 1471       | 10.6  | 812        | 1.2 | 364    | 1.2  | 4856   | 1.2 | 2876 | 1.3 |
| ZR/BCAR4 (4-OHT) 0 $\mu$ M         | 48533    | 1.6 | 3984      | 1.2 | 7037    | 0.6 | 11743 | 1.5 | 19970      | 144.2 | 3882       | 5.7 | 4920   | 15.7 | 5979   | 1.5 | 1682 | 0.8 |
| ZR/BCAR4 (4-OHT) 0.01 $\mu$ M      | 44802    | 1.4 | 3678      | 1.1 | 6884    | 0.6 | 13095 | 1.6 | 20313      | 146.6 | 2945       | 4.3 | 5665   | 18.1 | 6575   | 1.6 | 1835 | 0.8 |
| ZR/BCAR4 (4-OHT) 0.1 $\mu$ M       | 35596    | 1.1 | 3767      | 1.1 | 11294   | 1.0 | 11556 | 1.4 | 12259      | 88.5  | 1826       | 2.7 | 6021   | 19.3 | 8283   | 2.1 | 2006 | 0.9 |
| ZR/BCAR3 (E2) 0 $\mu$ M            | 25848    | 0.8 | 5105      | 1.5 | 20313   | 1.8 | 9045  | 1.1 | 835        | 6.0   | 456        | 0.7 | 430    | 1.4  | 6342   | 1.6 | 3023 | 1.4 |
| ZR/BCAR3 (E2) 0.01 $\mu$ M         | 24835    | 0.8 | 4770      | 1.4 | 14780   | 1.3 | 8193  | 1.0 | 872        | 6.3   | 276        | 0.4 | 241    | 0.8  | 6850   | 1.7 | 2419 | 1.1 |
| ZR/BCAR3 (E2) 0.1 $\mu$ M          | 23156    | 0.7 | 4068      | 1.2 | 14214   | 1.2 | 7223  | 0.9 | 1042       | 7.5   | 881        | 1.3 | 1407   | 4.5  | 5182   | 1.3 | 1852 | 0.8 |
| ZR/BCAR3 (4-OHT) 0 $\mu$ M         | 22925    | 0.7 | 4930      | 1.5 | 17748   | 1.5 | 10457 | 1.3 | 6905       | 49.8  | 1916       | 2.8 | 3752   | 12.0 | 5779   | 1.4 | 2082 | 1.0 |
| ZR/BCAR3 (4-OHT) 0.01 $\mu$ M      | 22248    | 0.7 | 4750      | 1.4 | 11545   | 1.0 | 9858  | 1.2 | 6368       | 46.0  | 1240       | 1.8 | 3519   | 11.3 | 4895   | 1.2 | 1583 | 0.7 |
| ZR/BCAR3 (4-OHT) 0.1 $\mu$ M       | 21590    | 0.7 | 4619      | 1.4 | 14574   | 1.3 | 11453 | 1.4 | 6595       | 47.6  | 1647       | 2.4 | 4176   | 13.4 | 5298   | 1.3 | 1591 | 0.7 |
| ZR/EGFR (E2) 0 $\mu$ M             | 47099    | 1.5 | 4934      | 1.5 | 17223   | 1.5 | 6477  | 0.8 | 302        | 2.2   | 428        | 0.6 | 1037   | 3.3  | 6581   | 1.6 | 2294 | 1.0 |
| ZR/EGFR (E2) 0.01 $\mu$ M          | 40135    | 1.3 | 4573      | 1.4 | 13004   | 1.1 | 5991  | 0.7 | 275        | 2.0   | 547        | 0.8 | 749    | 2.4  | 4784   | 1.2 | 2105 | 1.0 |
| ZR/EGFR (E2) 0.1 $\mu$ M           | 43478    | 1.4 | 4638      | 1.4 | 15429   | 1.3 | 6051  | 0.8 | 290        | 2.1   | 747        | 1.1 | 638    | 2.0  | 6075   | 1.5 | 2482 | 1.1 |
| ZR/EGFR (4-OHT + EGF) 0 $\mu$ M    | 46630    | 1.5 | 6634      | 2.0 | 17908   | 1.6 | 8111  | 1.0 | 906        | 6.5   | 674        | 1.0 | 2145   | 6.9  | 6361   | 1.6 | 1405 | 0.6 |
| ZR/EGFR (4-OHT + EGF) 0.01 $\mu$ M | 51021    | 1.6 | 6535      | 1.9 | 15367   | 1.3 | 7685  | 1.0 | 1253       | 9.0   | 874        | 1.3 | 2101   | 6.7  | 5914   | 1.5 | 1384 | 0.6 |
| ZR/EGFR (4-OHT + EGF) 0.1 $\mu$ M  | 42193    | 1.3 | 6412      | 1.9 | 13753   | 1.2 | 6748  | 0.8 | 1086       | 7.8   | 374        | 0.5 | 1498   | 4.8  | 4592   | 1.1 | 1112 | 0.5 |

| Sample Name                   | BCL2 (T56) |     | BCL2 (S70) |     | CASP 8 |     | CASP3 cl |     | CASP7 cl |     | CASP9 cl |     | CTNBB1 |     | CREB |     | Cyclin A |     |
|-------------------------------|------------|-----|------------|-----|--------|-----|----------|-----|----------|-----|----------|-----|--------|-----|------|-----|----------|-----|
|                               | AU         | R   | AU         | R   | AU     | R   | AU       | R   | AU       | R   | AU       | R   | AU     | R   | AU   | R   | AU       | R   |
| ZR/vector (E2) 0 μM           | 1103       | 1.0 | 2592       | 1.0 | 2553   | 1.0 | 1984     | 1.0 | 3948     | 1.0 | 3590     | 1.0 | 455    | 1.0 | 1491 | 1.0 | 1494     | 1.0 |
| ZR/vector (E2) 0.01 μM        | 984        | 0.9 | 896        | 0.3 | 2708   | 1.1 | 1626     | 0.8 | 4429     | 1.1 | 2893     | 0.8 | 642    | 1.4 | 1561 | 1.0 | 1785     | 1.2 |
| ZR/vector (E2) 0.1 μM         | 444        | 0.4 | 1331       | 0.5 | 2639   | 1.0 | 1354     | 0.7 | 3786     | 1.0 | 2819     | 0.8 | 623    | 1.4 | 1828 | 1.2 | 1326     | 0.9 |
| ZR/BCAR4 (E2) 0 μM            | 857        | 0.8 | 881        | 0.3 | 2755   | 1.1 | 1662     | 0.8 | 3741     | 0.9 | 3159     | 0.9 | 883    | 1.9 | 2940 | 2.0 | 2458     | 1.6 |
| ZR/BCAR4 (E2) 0.01 μM         | 610        | 0.6 | 1644       | 0.6 | 2870   | 1.1 | 4130     | 2.1 | 7187     | 1.8 | 3415     | 1.0 | 566    | 1.2 | 1947 | 1.3 | 1696     | 1.1 |
| ZR/BCAR4 (E2) 0.1 μM          | 1053       | 1.0 | 1488       | 0.6 | 2864   | 1.1 | 3159     | 1.6 | 4605     | 1.2 | 3689     | 1.0 | 756    | 1.7 | 2122 | 1.4 | 1667     | 1.1 |
| ZR/BCAR4 (4-OHT) 0 μM         | 854        | 0.8 | 1880       | 0.7 | 2269   | 0.9 | 4827     | 2.4 | 4205     | 1.1 | 2553     | 0.7 | 838    | 1.8 | 3565 | 2.4 | 1621     | 1.1 |
| ZR/BCAR4 (4-OHT) 0.01 μM      | 1060       | 1.0 | 1961       | 0.8 | 2568   | 1.0 | 5378     | 2.7 | 4311     | 1.1 | 3084     | 0.9 | 1002   | 2.2 | 3580 | 2.4 | 1651     | 1.1 |
| ZR/BCAR4 (4-OHT) 0.1 μM       | 1447       | 1.3 | 2315       | 0.9 | 2571   | 1.0 | 7391     | 3.7 | 6933     | 1.8 | 3641     | 1.0 | 923    | 2.0 | 4000 | 2.7 | 1289     | 0.9 |
| ZR/BCAR3 (E2) 0 μM            | 772        | 0.7 | 1561       | 0.6 | 3321   | 1.3 | 3294     | 1.7 | 4324     | 1.1 | 3921     | 1.1 | 764    | 1.7 | 1722 | 1.2 | 1410     | 0.9 |
| ZR/BCAR3 (E2) 0.01 μM         | 852        | 0.8 | 1132       | 0.4 | 2963   | 1.2 | 3328     | 1.7 | 3909     | 1.0 | 3855     | 1.1 | 740    | 1.6 | 2122 | 1.4 | 1636     | 1.1 |
| ZR/BCAR3 (E2) 0.1 μM          | 1162       | 1.1 | 1391       | 0.5 | 2165   | 0.8 | 3707     | 1.9 | 3544     | 0.9 | 2470     | 0.7 | 804    | 1.8 | 1776 | 1.2 | 1060     | 0.7 |
| ZR/BCAR3 (4-OHT) 0 μM         | 939        | 0.9 | 1710       | 0.7 | 2779   | 1.1 | 5597     | 2.8 | 4817     | 1.2 | 3294     | 0.9 | 1028   | 2.3 | 2993 | 2.0 | 1297     | 0.9 |
| ZR/BCAR3 (4-OHT) 0.01 μM      | 870        | 0.8 | 1494       | 0.6 | 2061   | 0.8 | 5095     | 2.6 | 4483     | 1.1 | 2350     | 0.7 | 1090   | 2.4 | 2470 | 1.7 | 1141     | 0.8 |
| ZR/BCAR3 (4-OHT) 0.1 μM       | 1066       | 1.0 | 1810       | 0.7 | 2543   | 1.0 | 5156     | 2.6 | 4684     | 1.2 | 2975     | 0.8 | 1008   | 2.2 | 3072 | 2.1 | 1220     | 0.8 |
| ZR/EGFR (E2) 0 μM             | 1293       | 1.2 | 1830       | 0.7 | 2576   | 1.0 | 4109     | 2.1 | 3495     | 0.9 | 2893     | 0.8 | 963    | 2.1 | 2571 | 1.7 | 1272     | 0.9 |
| ZR/EGFR (E2) 0.01 μM          | 1201       | 1.1 | 1602       | 0.6 | 2373   | 0.9 | 3782     | 1.9 | 3477     | 0.9 | 2887     | 0.8 | 829    | 1.8 | 2137 | 1.4 | 1032     | 0.7 |
| ZR/EGFR (E2) 0.1 μM           | 901        | 0.8 | 1358       | 0.5 | 2594   | 1.0 | 3913     | 2.0 | 3210     | 0.8 | 2668     | 0.7 | 759    | 1.7 | 2156 | 1.4 | 1135     | 0.8 |
| ZR/EGFR (4-OHT + EGF) 0 μM    | 1666       | 1.5 | 1744       | 0.7 | 2152   | 0.8 | 4803     | 2.4 | 3805     | 1.0 | 3184     | 0.9 | 927    | 2.0 | 3944 | 2.6 | 1265     | 0.8 |
| ZR/EGFR (4-OHT + EGF) 0.01 μM | 1454       | 1.3 | 1588       | 0.6 | 2169   | 0.8 | 4944     | 2.5 | 3771     | 1.0 | 2641     | 0.7 | 1044   | 2.3 | 3767 | 2.5 | 1229     | 0.8 |
| ZR/EGFR (4-OHT + EGF) 0.1 μM  | 1638       | 1.5 | 1321       | 0.5 | 1951   | 0.8 | 4555     | 2.3 | 3980     | 1.0 | 2545     | 0.7 | 982    | 2.2 | 3358 | 2.3 | 1264     | 0.8 |

| Sample Name                        | Cyclin D1 |     | Cyclin E |     | total EGFR |       | EIF4G |     | eNOS-NOSIII |     | Total ESR1 |     | ESR1 |     | total ERBB2 |     | ERBB2 |      |
|------------------------------------|-----------|-----|----------|-----|------------|-------|-------|-----|-------------|-----|------------|-----|------|-----|-------------|-----|-------|------|
|                                    | AU        | R   | AU       | R   | AU         | R     | AU    | R   | AU          | R   | AU         | R   | AU   | R   | AU          | R   | AU    | R    |
| ZR/vector (E2) 0 $\mu$ M           | 6223      | 1.0 | 4320     | 1.0 | 183        | 1.0   | 4201  | 1.0 | 5569        | 1.0 | 2222       | 1.0 | 3255 | 1.0 | 4974        | 1.0 | 2239  | 1.0  |
| ZR/vector (E2) 0.01 $\mu$ M        | 7716      | 1.2 | 5146     | 1.2 | 222        | 1.2   | 5410  | 1.3 | 7080        | 1.3 | 2573       | 1.2 | 3960 | 1.2 | 7339        | 1.5 | 2636  | 1.2  |
| ZR/vector (E2) 0.1 $\mu$ M         | 7495      | 1.2 | 5287     | 1.2 | 626        | 3.4   | 4798  | 1.1 | 6173        | 1.1 | 2470       | 1.1 | 3816 | 1.2 | 6112        | 1.2 | 2847  | 1.3  |
| ZR/BCAR4 (E2) 0 $\mu$ M            | 12506     | 2.0 | 10178    | 2.4 | 1169       | 6.4   | 9557  | 2.3 | 6529        | 1.2 | 1527       | 0.7 | 4167 | 1.3 | 3565        | 0.7 | 27447 | 12.3 |
| ZR/BCAR4 (E2) 0.01 $\mu$ M         | 7990      | 1.3 | 6549     | 1.5 | 99         | 0.5   | 2376  | 0.6 | 5448        | 1.0 | 1383       | 0.6 | 3752 | 1.2 | 10583       | 2.1 | 3298  | 1.5  |
| ZR/BCAR4 (E2) 0.1 $\mu$ M          | 8604      | 1.4 | 7480     | 1.7 | 337        | 1.8   | 4496  | 1.1 | 4939        | 0.9 | 1732       | 0.8 | 3667 | 1.1 | 9789        | 2.0 | 5608  | 2.5  |
| ZR/BCAR4 (4-OHT) 0 $\mu$ M         | 10775     | 1.7 | 5745     | 1.3 | 351        | 1.9   | 8160  | 1.9 | 7700        | 1.4 | 1028       | 0.5 | 2347 | 0.7 | 10797       | 2.2 | 20640 | 9.2  |
| ZR/BCAR4 (4-OHT) 0.01 $\mu$ M      | 12734     | 2.0 | 6198     | 1.4 | 445        | 2.4   | 8493  | 2.0 | 8493        | 1.5 | 1112       | 0.5 | 2455 | 0.8 | 14988       | 3.0 | 21248 | 9.5  |
| ZR/BCAR4 (4-OHT) 0.1 $\mu$ M       | 11580     | 1.9 | 5855     | 1.4 | 352        | 1.9   | 7194  | 1.7 | 8760        | 1.6 | 1146       | 0.5 | 2324 | 0.7 | 27447       | 5.5 | 10808 | 4.8  |
| ZR/BCAR3 (E2) 0 $\mu$ M            | 7087      | 1.1 | 8442     | 2.0 | 59         | 0.3   | 8242  | 2.0 | 5525        | 1.0 | 2167       | 1.0 | 4286 | 1.3 | 15662       | 3.1 | 4105  | 1.8  |
| ZR/BCAR3 (E2) 0.01 $\mu$ M         | 6926      | 1.1 | 8039     | 1.9 | 311        | 1.7   | 6775  | 1.6 | 5453        | 1.0 | 2043       | 0.9 | 3984 | 1.2 | 19811       | 4.0 | 3928  | 1.8  |
| ZR/BCAR3 (E2) 0.1 $\mu$ M          | 5313      | 0.9 | 4474     | 1.0 | 253        | 1.4   | 7016  | 1.7 | 4394        | 0.8 | 1306       | 0.6 | 2540 | 0.8 | 19341       | 3.9 | 4126  | 1.8  |
| ZR/BCAR3 (4-OHT) 0 $\mu$ M         | 6884      | 1.1 | 6003     | 1.4 | 296        | 1.6   | 7281  | 1.7 | 7495        | 1.3 | 1753       | 0.8 | 2485 | 0.8 | 27447       | 5.5 | 6581  | 2.9  |
| ZR/BCAR3 (4-OHT) 0.01 $\mu$ M      | 5802      | 0.9 | 5115     | 1.2 | 197        | 1.1   | 6003  | 1.4 | 7739        | 1.4 | 1196       | 0.5 | 2084 | 0.6 | 26370       | 5.3 | 5710  | 2.5  |
| ZR/BCAR3 (4-OHT) 0.1 $\mu$ M       | 6069      | 1.0 | 5470     | 1.3 | 129        | 0.7   | 6368  | 1.5 | 8063        | 1.4 | 1612       | 0.7 | 2303 | 0.7 | 28001       | 5.6 | 6229  | 2.8  |
| ZR/EGFR (E2) 0 $\mu$ M             | 8201      | 1.3 | 5287     | 1.2 | 16631      | 91.0  | 7274  | 1.7 | 5855        | 1.1 | 1317       | 0.6 | 2211 | 0.7 | 5187        | 1.0 | 2165  | 1.0  |
| ZR/EGFR (E2) 0.01 $\mu$ M          | 6267      | 1.0 | 4523     | 1.0 | 15804      | 86.5  | 4642  | 1.1 | 5525        | 1.0 | 1424       | 0.6 | 2477 | 0.8 | 6285        | 1.3 | 1974  | 0.9  |
| ZR/EGFR (E2) 0.1 $\mu$ M           | 7274      | 1.2 | 5271     | 1.2 | 15678      | 85.8  | 5372  | 1.3 | 5855        | 1.1 | 1143       | 0.5 | 2830 | 0.9 | 5866        | 1.2 | 2222  | 1.0  |
| ZR/EGFR (4-OHT + EGF) 0 $\mu$ M    | 12345     | 2.0 | 5872     | 1.4 | 26635      | 145.8 | 8144  | 1.9 | 8226        | 1.5 | 602        | 0.3 | 2084 | 0.6 | 12670       | 2.5 | 5004  | 2.2  |
| ZR/EGFR (4-OHT + EGF) 0.01 $\mu$ M | 10017     | 1.6 | 5054     | 1.2 | 24101      | 131.9 | 5687  | 1.4 | 8047        | 1.4 | 619        | 0.3 | 1980 | 0.6 | 14343       | 2.9 | 4959  | 2.2  |
| ZR/EGFR (4-OHT + EGF) 0.1 $\mu$ M  | 9100      | 1.5 | 4832     | 1.1 | 22697      | 124.2 | 5100  | 1.2 | 8317        | 1.5 | 412        | 0.2 | 1939 | 0.6 | 14003       | 2.8 | 4959  | 2.2  |

| Sample Name                        | ERBB3 |     | total ERBB4 |     | ERK1-2 |     | FADD  |     | FAK   |     | FOXO1 (S256) |     | FOXO3 (S253) |     | FOXO1/3 (T24/32) |     | GSK3A/B |     |
|------------------------------------|-------|-----|-------------|-----|--------|-----|-------|-----|-------|-----|--------------|-----|--------------|-----|------------------|-----|---------|-----|
|                                    | AU    | R   | AU          | R   | AU     | R   |       | R   | AU    | R   | AU           | R   | AU           | R   | AU               | R   | AU      | R   |
| ZR/vector (E2) 0 $\mu$ M           | 2421  | 1.0 | 4342        | 1.0 | 1043   | 1.0 | 10551 | 1.0 | 2612  | 1.0 | 3572         | 1.0 | 8578         | 1.0 | 1112             | 1.0 | 6575    | 1.0 |
| ZR/vector (E2) 0.01 $\mu$ M        | 2251  | 0.9 | 5508        | 1.3 | 1256   | 1.2 | 12382 | 1.2 | 3175  | 1.2 | 4171         | 1.2 | 7420         | 0.9 | 1213             | 1.1 | 6933    | 1.1 |
| ZR/vector (E2) 0.1 $\mu$ M         | 2438  | 1.0 | 4915        | 1.1 | 1193   | 1.1 | 11837 | 1.1 | 4101  | 1.6 | 3855         | 1.1 | 8647         | 1.0 | 1120             | 1.0 | 6211    | 0.9 |
| ZR/BCAR4 (E2) 0 $\mu$ M            | 12481 | 5.2 | 5405        | 1.2 | 2147   | 2.1 | 15584 | 1.5 | 19380 | 7.4 | 6015         | 1.7 | 10604        | 1.2 | 7677             | 6.9 | 13440   | 2.0 |
| ZR/BCAR4 (E2) 0.01 $\mu$ M         | 4765  | 2.0 | 4871        | 1.1 | 1564   | 1.5 | 6614  | 0.6 | 2948  | 1.1 | 4746         | 1.3 | 13671        | 1.6 | 1566             | 1.4 | 7624    | 1.2 |
| ZR/BCAR4 (E2) 0.1 $\mu$ M          | 7700  | 3.2 | 5443        | 1.3 | 1358   | 1.3 | 8911  | 0.8 | 3748  | 1.4 | 4746         | 1.3 | 13280        | 1.5 | 2873             | 2.6 | 10711   | 1.6 |
| ZR/BCAR4 (4-OHT) 0 $\mu$ M         | 17765 | 7.3 | 5508        | 1.3 | 983    | 0.9 | 17018 | 1.6 | 9256  | 3.5 | 4097         | 1.1 | 8630         | 1.0 | 6027             | 5.4 | 12040   | 1.8 |
| ZR/BCAR4 (4-OHT) 0.01 $\mu$ M      | 18770 | 7.8 | 6674        | 1.5 | 832    | 0.8 | 16482 | 1.6 | 7731  | 3.0 | 4713         | 1.3 | 8725         | 1.0 | 6708             | 6.0 | 12040   | 1.8 |
| ZR/BCAR4 (4-OHT) 0.1 $\mu$ M       | 20191 | 8.3 | 6919        | 1.6 | 808    | 0.8 | 14516 | 1.4 | 3767  | 1.4 | 4519         | 1.3 | 7723         | 0.9 | 7919             | 7.1 | 9585    | 1.5 |
| ZR/BCAR3 (E2) 0 $\mu$ M            | 2628  | 1.1 | 5229        | 1.2 | 1132   | 1.1 | 14794 | 1.4 | 2326  | 0.9 | 4827         | 1.4 | 8217         | 1.0 | 2907             | 2.6 | 12247   | 1.9 |
| ZR/BCAR3 (E2) 0.01 $\mu$ M         | 2329  | 1.0 | 5603        | 1.3 | 1207   | 1.2 | 13333 | 1.3 | 2338  | 0.9 | 4741         | 1.3 | 8691         | 1.0 | 2830             | 2.5 | 11328   | 1.7 |
| ZR/BCAR3 (E2) 0.1 $\mu$ M          | 1839  | 0.8 | 4656        | 1.1 | 687    | 0.7 | 14883 | 1.4 | 1259  | 0.5 | 3685         | 1.0 | 8991         | 1.0 | 1937             | 1.7 | 9653    | 1.5 |
| ZR/BCAR3 (4-OHT) 0 $\mu$ M         | 2257  | 0.9 | 6483        | 1.5 | 852    | 0.8 | 12978 | 1.2 | 1698  | 0.6 | 4934         | 1.4 | 8613         | 1.0 | 4910             | 4.4 | 8604    | 1.3 |
| ZR/BCAR3 (4-OHT) 0.01 $\mu$ M      | 1610  | 0.7 | 6445        | 1.5 | 659    | 0.6 | 13121 | 1.2 | 1553  | 0.6 | 4247         | 1.2 | 9009         | 1.1 | 4793             | 4.3 | 6836    | 1.0 |
| ZR/BCAR3 (4-OHT) 0.1 $\mu$ M       | 1476  | 0.6 | 7252        | 1.7 | 682    | 0.7 | 13069 | 1.2 | 1498  | 0.6 | 4294         | 1.2 | 8682         | 1.0 | 5710             | 5.1 | 8014    | 1.2 |
| ZR/EGFR (E2) 0 $\mu$ M             | 2371  | 1.0 | 3882        | 0.9 | 1776   | 1.7 | 12506 | 1.2 | 1774  | 0.7 | 4113         | 1.2 | 12607        | 1.5 | 2078             | 1.9 | 6714    | 1.0 |
| ZR/EGFR (E2) 0.01 $\mu$ M          | 2273  | 0.9 | 3809        | 0.9 | 966    | 0.9 | 9018  | 0.9 | 1507  | 0.6 | 3484         | 1.0 | 13056        | 1.5 | 1760             | 1.6 | 5497    | 0.8 |
| ZR/EGFR (E2) 0.1 $\mu$ M           | 2269  | 0.9 | 3616        | 0.8 | 1450   | 1.4 | 9711  | 0.9 | 1737  | 0.7 | 3816         | 1.1 | 13386        | 1.6 | 1616             | 1.5 | 6393    | 1.0 |
| ZR/EGFR (4-OHT + EGF) 0 $\mu$ M    | 2045  | 0.8 | 3685        | 0.8 | 3096   | 3.0 | 15398 | 1.5 | 2049  | 0.8 | 3576         | 1.0 | 12161        | 1.4 | 8392             | 7.5 | 5591    | 0.9 |
| ZR/EGFR (4-OHT + EGF) 0.01 $\mu$ M | 1899  | 0.8 | 3681        | 0.8 | 3502   | 3.4 | 13575 | 1.3 | 1667  | 0.6 | 3715         | 1.0 | 12557        | 1.5 | 7669             | 6.9 | 5890    | 0.9 |
| ZR/EGFR (4-OHT + EGF) 0.1 $\mu$ M  | 1832  | 0.8 | 3948        | 0.9 | 2925   | 2.8 | 14087 | 1.3 | 1957  | 0.7 | 3402         | 1.0 | 12734        | 1.5 | 6694             | 6.0 | 4601    | 0.7 |

| Sample Name                        | NFKBIA |     | IRS1 |     | KIT (Y719) |     | KIT (Y721) |     | MARCKS |     | MEK1/2 |     | Met Y1234-1235 |     | MTOR (S2448) |     | MTOR (S2481) |     |
|------------------------------------|--------|-----|------|-----|------------|-----|------------|-----|--------|-----|--------|-----|----------------|-----|--------------|-----|--------------|-----|
|                                    | AU     | R   | AU   | R   | AU         | R   | AU         | R   | AU     | R   | AU     | R   | AU             | R   | AU           | R   | AU           | R   |
| ZR/vector (E2) 0 $\mu$ M           | 9256   | 1.0 | 4798 | 1.0 | 17659      | 1.0 | 3100       | 1.0 | 5773   | 1.0 | 8071   | 1.0 | 7824           | 1.0 | 4117         | 1.0 | 6755         | 1.0 |
| ZR/vector (E2) 0.01 $\mu$ M        | 9740   | 1.1 | 7130 | 1.5 | 20764      | 1.2 | 3608       | 1.2 | 5670   | 1.0 | 10700  | 1.3 | 9414           | 1.2 | 5004         | 1.2 | 7848         | 1.2 |
| ZR/vector (E2) 0.1 $\mu$ M         | 10199  | 1.1 | 4750 | 1.0 | 19477      | 1.1 | 3391       | 1.1 | 5541   | 1.0 | 9063   | 1.1 | 8375           | 1.1 | 4012         | 1.0 | 7180         | 1.1 |
| ZR/BCAR4 (E2) 0 $\mu$ M            | 10883  | 1.2 | 6877 | 1.4 | 20496      | 1.2 | 4689       | 1.5 | 7428   | 1.3 | 12746  | 1.6 | 11081          | 1.4 | 8217         | 2.0 | 13589        | 2.0 |
| ZR/BCAR4 (E2) 0.01 $\mu$ M         | 7616   | 0.8 | 4514 | 0.9 | 17998      | 1.0 | 3456       | 1.1 | 6161   | 1.1 | 8578   | 1.1 | 11476          | 1.5 | 3374         | 0.8 | 5802         | 0.9 |
| ZR/BCAR4 (E2) 0.1 $\mu$ M          | 8613   | 0.9 | 4949 | 1.0 | 17624      | 1.0 | 4036       | 1.3 | 6628   | 1.1 | 8417   | 1.0 | 10786          | 1.4 | 4230         | 1.0 | 6741         | 1.0 |
| ZR/BCAR4 (4-OHT) 0 $\mu$ M         | 6960   | 0.8 | 3548 | 0.7 | 18657      | 1.1 | 4487       | 1.4 | 4601   | 0.8 | 11897  | 1.5 | 13739          | 1.8 | 9711         | 2.4 | 16269        | 2.4 |
| ZR/BCAR4 (4-OHT) 0.01 $\mu$ M      | 7465   | 0.8 | 3996 | 0.8 | 19341      | 1.1 | 4774       | 1.5 | 4890   | 0.8 | 11719  | 1.5 | 12746          | 1.6 | 10239        | 2.5 | 20723        | 3.1 |
| ZR/BCAR4 (4-OHT) 0.1 $\mu$ M       | 7624   | 0.8 | 3996 | 0.8 | 18490      | 1.0 | 3917       | 1.3 | 4564   | 0.8 | 11237  | 1.4 | 12862          | 1.6 | 10711        | 2.6 | 21807        | 3.2 |
| ZR/BCAR3 (E2) 0 $\mu$ M            | 8639   | 0.9 | 4072 | 0.8 | 18398      | 1.0 | 3540       | 1.1 | 6355   | 1.1 | 11226  | 1.4 | 12797          | 1.6 | 6100         | 1.5 | 8300         | 1.2 |
| ZR/BCAR3 (E2) 0.01 $\mu$ M         | 8209   | 0.9 | 3882 | 0.8 | 19226      | 1.1 | 3526       | 1.1 | 6027   | 1.0 | 9997   | 1.2 | 11533          | 1.5 | 5394         | 1.3 | 7165         | 1.1 |
| ZR/BCAR3 (E2) 0.1 $\mu$ M          | 7465   | 0.8 | 3226 | 0.7 | 15772      | 0.9 | 3255       | 1.1 | 4032   | 0.7 | 9433   | 1.2 | 11533          | 1.5 | 6217         | 1.5 | 7824         | 1.2 |
| ZR/BCAR3 (4-OHT) 0 $\mu$ M         | 7935   | 0.9 | 4077 | 0.8 | 20292      | 1.1 | 3670       | 1.2 | 5329   | 0.9 | 13030  | 1.6 | 15154          | 1.9 | 9691         | 2.4 | 16916        | 2.5 |
| ZR/BCAR3 (4-OHT) 0.01 $\mu$ M      | 7130   | 0.8 | 3121 | 0.7 | 16731      | 0.9 | 3484       | 1.1 | 4117   | 0.7 | 12557  | 1.6 | 14516          | 1.9 | 9481         | 2.3 | 16043        | 2.4 |
| ZR/BCAR3 (4-OHT) 0.1 $\mu$ M       | 7887   | 0.9 | 3544 | 0.7 | 18270      | 1.0 | 3388       | 1.1 | 4000   | 0.7 | 12247  | 1.5 | 14662          | 1.9 | 10808        | 2.6 | 19187        | 2.8 |
| ZR/EGFR (E2) 0 $\mu$ M             | 7864   | 0.8 | 4959 | 1.0 | 17854      | 1.0 | 3601       | 1.2 | 4861   | 0.8 | 11193  | 1.4 | 13891          | 1.8 | 5670         | 1.4 | 8578         | 1.3 |
| ZR/EGFR (E2) 0.01 $\mu$ M          | 7801   | 0.8 | 4226 | 0.9 | 16498      | 0.9 | 3605       | 1.2 | 4880   | 0.8 | 10067  | 1.2 | 12113          | 1.5 | 4474         | 1.1 | 6708         | 1.0 |
| ZR/EGFR (E2) 0.1 $\mu$ M           | 8267   | 0.9 | 5029 | 1.0 | 17962      | 1.0 | 3729       | 1.2 | 5614   | 1.0 | 11026  | 1.4 | 12569          | 1.6 | 4939         | 1.2 | 6601         | 1.0 |
| ZR/EGFR (4-OHT + EGF) 0 $\mu$ M    | 7458   | 0.8 | 5608 | 1.2 | 17413      | 1.0 | 3388       | 1.1 | 3759   | 0.7 | 13919  | 1.7 | 15788          | 2.0 | 11026        | 2.7 | 14721        | 2.2 |
| ZR/EGFR (4-OHT + EGF) 0.01 $\mu$ M | 7692   | 0.8 | 5659 | 1.2 | 18288      | 1.0 | 3663       | 1.2 | 4256   | 0.7 | 13575  | 1.7 | 15321          | 2.0 | 9136         | 2.2 | 12333        | 1.8 |
| ZR/EGFR (4-OHT + EGF) 0.1 $\mu$ M  | 6905   | 0.7 | 5193 | 1.1 | 17536      | 1.0 | 3412       | 1.1 | 3689   | 0.6 | 12557  | 1.6 | 14618          | 1.9 | 8613         | 2.1 | 12161        | 1.8 |

| Sample Name                   | NFKB |     | P38  |     | P70s6k |     | p90  |     | PKAC |     | PKCA  |     | PKCD |     | PKCZ-I |     | PRAS40 |     |
|-------------------------------|------|-----|------|-----|--------|-----|------|-----|------|-----|-------|-----|------|-----|--------|-----|--------|-----|
|                               | AU   | R   | AU   | R   | AU     | R   |      | R   | AU   | R   | AU    | R   | AU   | R   | AU     | R   | AU     | R   |
| ZR/vector (E2) 0 μM           | 4060 | 1.0 | 5564 | 1.0 | 2573   | 1.0 | 3498 | 1.0 | 3790 | 1.0 | 5105  | 1.0 | 2357 | 1.0 | 19341  | 1.0 | 10219  | 1.0 |
| ZR/vector (E2) 0.01 μM        | 6273 | 1.5 | 5519 | 1.0 | 3090   | 1.2 | 4717 | 1.3 | 4032 | 1.1 | 5808  | 1.1 | 1474 | 0.6 | 20070  | 1.0 | 10499  | 1.0 |
| ZR/vector (E2) 0.1 μM         | 4407 | 1.1 | 5405 | 1.0 | 3035   | 1.2 | 3797 | 1.1 | 5105 | 1.3 | 5508  | 1.1 | 1772 | 0.8 | 21960  | 1.1 | 9701   | 0.9 |
| ZR/BCAR4 (E2) 0 μM            | 6003 | 1.5 | 9339 | 1.7 | 4514   | 1.8 | 3249 | 0.9 | 4871 | 1.3 | 6368  | 1.2 | 1017 | 0.4 | 16236  | 0.8 | 22026  | 2.2 |
| ZR/BCAR4 (E2) 0.01 μM         | 3502 | 0.9 | 5745 | 1.0 | 2428   | 0.9 | 3576 | 1.0 | 2298 | 0.6 | 8682  | 1.7 | 3419 | 1.5 | 22471  | 1.2 | 12849  | 1.3 |
| ZR/BCAR4 (E2) 0.1 μM          | 3756 | 0.9 | 6953 | 1.2 | 3191   | 1.2 | 4438 | 1.3 | 3232 | 0.9 | 8392  | 1.6 | 1951 | 0.8 | 20973  | 1.1 | 21015  | 2.1 |
| ZR/BCAR4 (4-OHT) 0 μM         | 1828 | 0.5 | 4871 | 0.9 | 3470   | 1.3 | 2280 | 0.7 | 1128 | 0.3 | 3729  | 0.7 | 2045 | 0.9 | 13069  | 0.7 | 22925  | 2.2 |
| ZR/BCAR4 (4-OHT) 0.01 μM      | 2022 | 0.5 | 4974 | 0.9 | 3851   | 1.5 | 2615 | 0.7 | 1028 | 0.3 | 3456  | 0.7 | 2226 | 0.9 | 12952  | 0.7 | 21655  | 2.1 |
| ZR/BCAR4 (4-OHT) 0.1 μM       | 1901 | 0.5 | 4866 | 0.9 | 3670   | 1.4 | 2473 | 0.7 | 1175 | 0.3 | 3334  | 0.7 | 2322 | 1.0 | 12683  | 0.7 | 19497  | 1.9 |
| ZR/BCAR3 (E2) 0 μM            | 3778 | 0.9 | 5716 | 1.0 | 3408   | 1.3 | 3767 | 1.1 | 2827 | 0.7 | 6905  | 1.4 | 2333 | 1.0 | 22925  | 1.2 | 21873  | 2.1 |
| ZR/BCAR3 (E2) 0.01 μM         | 4056 | 1.0 | 6355 | 1.1 | 3255   | 1.3 | 3685 | 1.1 | 2853 | 0.8 | 6768  | 1.3 | 2264 | 1.0 | 21483  | 1.1 | 20374  | 2.0 |
| ZR/BCAR3 (E2) 0.1 μM          | 1933 | 0.5 | 4180 | 0.8 | 3150   | 1.2 | 2548 | 0.7 | 2016 | 0.5 | 5949  | 1.2 | 1735 | 0.7 | 17018  | 0.9 | 17854  | 1.7 |
| ZR/BCAR3 (4-OHT) 0 μM         | 2431 | 0.6 | 6728 | 1.2 | 3477   | 1.4 | 3038 | 0.9 | 1711 | 0.5 | 4333  | 0.8 | 2305 | 1.0 | 16059  | 0.8 | 23624  | 2.3 |
| ZR/BCAR3 (4-OHT) 0.01 μM      | 1652 | 0.4 | 4765 | 0.9 | 3184   | 1.2 | 1926 | 0.6 | 1198 | 0.3 | 3996  | 0.8 | 1863 | 0.8 | 12978  | 0.7 | 20090  | 2.0 |
| ZR/BCAR3 (4-OHT) 0.1 μM       | 2000 | 0.5 | 5448 | 1.0 | 3304   | 1.3 | 2217 | 0.6 | 1494 | 0.4 | 3737  | 0.7 | 2180 | 0.9 | 13602  | 0.7 | 21786  | 2.1 |
| ZR/EGFR (E2) 0 μM             | 2649 | 0.7 | 5536 | 1.0 | 3288   | 1.3 | 3752 | 1.1 | 2774 | 0.7 | 11766 | 2.3 | 2065 | 0.9 | 21829  | 1.1 | 17001  | 1.7 |
| ZR/EGFR (E2) 0.01 μM          | 2579 | 0.6 | 5497 | 1.0 | 2724   | 1.1 | 3491 | 1.0 | 3159 | 0.8 | 11048 | 2.2 | 1806 | 0.8 | 22004  | 1.1 | 13905  | 1.4 |
| ZR/EGFR (E2) 0.1 μM           | 2373 | 0.6 | 6173 | 1.1 | 3087   | 1.2 | 3858 | 1.1 | 2791 | 0.7 | 12308 | 2.4 | 1986 | 0.8 | 21333  | 1.1 | 13891  | 1.4 |
| ZR/EGFR (4-OHT + EGF) 0 μM    | 1929 | 0.5 | 5245 | 0.9 | 4056   | 1.6 | 3415 | 1.0 | 1615 | 0.4 | 15154 | 3.0 | 1786 | 0.8 | 15154  | 0.8 | 11487  | 1.1 |
| ZR/EGFR (4-OHT + EGF) 0.01 μM | 2458 | 0.6 | 5937 | 1.1 | 3793   | 1.5 | 3245 | 0.9 | 1914 | 0.5 | 18197 | 3.6 | 1664 | 0.7 | 15615  | 0.8 | 11499  | 1.1 |
| ZR/EGFR (4-OHT + EGF) 0.1 μM  | 1715 | 0.4 | 4827 | 0.9 | 3484   | 1.4 | 2722 | 0.8 | 1299 | 0.3 | 14958 | 2.9 | 1373 | 0.6 | 14214  | 0.7 | 11215  | 1.1 |



| Sample Name                        | PTEN |     | ARAF |     | BRAF  |     | CRAF  |     | RASGRF |     | SAPK/JNK |     | SHC  |      | DIABLO |     | SMAD2 |     |
|------------------------------------|------|-----|------|-----|-------|-----|-------|-----|--------|-----|----------|-----|------|------|--------|-----|-------|-----|
|                                    | AU   | R   | AU   | R   | AU    | R   | AU    | R   | AU     | R   | AU       | R   | AU   | R    | AU     | R   | AU    | R   |
| ZR/vector (E2) 0 $\mu$ M           | 1626 | 1.0 | 2785 | 1.0 | 7716  | 1.0 | 6884  | 1.0 | 8866   | 1.0 | 1200     | 1.0 | 248  | 1.0  | 26903  | 1.0 | 4656  | 1.0 |
| ZR/vector (E2) 0.01 $\mu$ M        | 2016 | 1.2 | 3188 | 1.1 | 8787  | 1.1 | 7943  | 1.2 | 11037  | 1.2 | 1373     | 1.1 | 288  | 1.2  | 27722  | 1.0 | 5558  | 1.2 |
| ZR/vector (E2) 0.1 $\mu$ M         | 2246 | 1.4 | 2793 | 1.0 | 8119  | 1.1 | 8392  | 1.2 | 13616  | 1.5 | 1480     | 1.2 | 328  | 1.3  | 30333  | 1.1 | 5569  | 1.2 |
| ZR/BCAR4 (E2) 0 $\mu$ M            | 1852 | 1.1 | 3572 | 1.3 | 11510 | 1.5 | 14257 | 2.1 | 12900  | 1.5 | 1694     | 1.4 | 7037 | 28.3 | 29144  | 1.1 | 7144  | 1.5 |
| ZR/BCAR4 (E2) 0.01 $\mu$ M         | 1751 | 1.1 | 2599 | 0.9 | 9009  | 1.2 | 6850  | 1.0 | 14472  | 1.6 | 517      | 0.4 | 241  | 1.0  | 27447  | 1.0 | 4412  | 0.9 |
| ZR/BCAR4 (E2) 0.1 $\mu$ M          | 1691 | 1.0 | 2899 | 1.0 | 9838  | 1.3 | 8006  | 1.2 | 13481  | 1.5 | 860      | 0.7 | 839  | 3.4  | 27174  | 1.0 | 4569  | 1.0 |
| ZR/BCAR4 (4-OHT) 0 $\mu$ M         | 1464 | 0.9 | 4346 | 1.6 | 11373 | 1.5 | 13507 | 2.0 | 16334  | 1.8 | 1607     | 1.3 | 4900 | 19.7 | 22471  | 0.8 | 6015  | 1.3 |
| ZR/BCAR4 (4-OHT) 0.01 $\mu$ M      | 1633 | 1.0 | 4171 | 1.5 | 11968 | 1.6 | 12862 | 1.9 | 17677  | 2.0 | 1681     | 1.4 | 4703 | 18.9 | 24588  | 0.9 | 7310  | 1.6 |
| ZR/BCAR4 (4-OHT) 0.1 $\mu$ M       | 1797 | 1.1 | 4359 | 1.6 | 10883 | 1.4 | 10960 | 1.6 | 16731  | 1.9 | 1476     | 1.2 | 1912 | 7.7  | 24101  | 0.9 | 7887  | 1.7 |
| ZR/BCAR3 (E2) 0 $\mu$ M            | 1871 | 1.2 | 2652 | 1.0 | 9987  | 1.3 | 9769  | 1.4 | 17344  | 2.0 | 874      | 0.7 | 385  | 1.6  | 27174  | 1.0 | 5564  | 1.2 |
| ZR/BCAR3 (E2) 0.01 $\mu$ M         | 1867 | 1.1 | 2807 | 1.0 | 8822  | 1.1 | 10239 | 1.5 | 17137  | 1.9 | 855      | 0.7 | 308  | 1.2  | 27722  | 1.0 | 4842  | 1.0 |
| ZR/BCAR3 (E2) 0.1 $\mu$ M          | 1447 | 0.9 | 2597 | 0.9 | 8063  | 1.0 | 9740  | 1.4 | 14618  | 1.6 | 679      | 0.6 | 207  | 0.8  | 22925  | 0.9 | 4192  | 0.9 |
| ZR/BCAR3 (4-OHT) 0 $\mu$ M         | 1841 | 1.1 | 4514 | 1.6 | 8596  | 1.1 | 13481 | 2.0 | 19092  | 2.2 | 1088     | 0.9 | 419  | 1.7  | 27722  | 1.0 | 6081  | 1.3 |
| ZR/BCAR3 (4-OHT) 0.01 $\mu$ M      | 1510 | 0.9 | 4101 | 1.5 | 9091  | 1.2 | 10647 | 1.5 | 15963  | 1.8 | 986      | 0.8 | 384  | 1.5  | 24101  | 0.9 | 6039  | 1.3 |
| ZR/BCAR3 (4-OHT) 0.1 $\mu$ M       | 1607 | 1.0 | 4605 | 1.7 | 9917  | 1.3 | 12939 | 1.9 | 18124  | 2.0 | 1054     | 0.9 | 394  | 1.6  | 26370  | 1.0 | 6503  | 1.4 |
| ZR/EGFR (E2) 0 $\mu$ M             | 1698 | 1.0 | 3385 | 1.2 | 10604 | 1.4 | 13535 | 2.0 | 14214  | 1.6 | 2169     | 1.8 | 443  | 1.8  | 25848  | 1.0 | 6317  | 1.4 |
| ZR/EGFR (E2) 0.01 $\mu$ M          | 2289 | 1.4 | 3519 | 1.3 | 9424  | 1.2 | 10615 | 1.5 | 15522  | 1.8 | 1661     | 1.4 | 276  | 1.1  | 27174  | 1.0 | 5405  | 1.2 |
| ZR/EGFR (E2) 0.1 $\mu$ M           | 2071 | 1.3 | 3255 | 1.2 | 9036  | 1.2 | 12394 | 1.8 | 14300  | 1.6 | 1808     | 1.5 | 296  | 1.2  | 28283  | 1.1 | 5785  | 1.2 |
| ZR/EGFR (4-OHT + EGF) 0 $\mu$ M    | 1621 | 1.0 | 5722 | 2.1 | 10764 | 1.4 | 17206 | 2.5 | 17223  | 1.9 | 1770     | 1.5 | 1169 | 4.7  | 24101  | 0.9 | 6149  | 1.3 |
| ZR/EGFR (4-OHT + EGF) 0.01 $\mu$ M | 1516 | 0.9 | 6668 | 2.4 | 10209 | 1.3 | 17659 | 2.6 | 17536  | 2.0 | 1746     | 1.5 | 783  | 3.2  | 24835  | 0.9 | 5890  | 1.3 |
| ZR/EGFR (4-OHT + EGF) 0.1 $\mu$ M  | 1467 | 0.9 | 6490 | 2.3 | 10467 | 1.4 | 13535 | 2.0 | 16220  | 1.8 | 1686     | 1.4 | 810  | 3.3  | 23389  | 0.9 | 5162  | 1.1 |

| Sample Name                        | STAT3 (S727) |     | STAT3 (Y705) |     | STAT 5 |     | STAT6 |     | KDR/VEGFR2 |     |
|------------------------------------|--------------|-----|--------------|-----|--------|-----|-------|-----|------------|-----|
|                                    | AU           | R   | AU           | R   | AU     | R   | AU    | R   | AU         | R   |
| ZR/vector (E2) 0 $\mu$ M           | 10647        | 1.0 | 2336         | 1.0 | 862    | 1.0 | 615   | 1.0 | 15139      | 1.0 |
| ZR/vector (E2) 0.01 $\mu$ M        | 13725        | 1.3 | 2788         | 1.2 | 1001   | 1.2 | 645   | 1.0 | 18160      | 1.2 |
| ZR/vector (E2) 0.1 $\mu$ M         | 11396        | 1.1 | 2530         | 1.1 | 921    | 1.1 | 666   | 1.1 | 17588      | 1.2 |
| ZR/BCAR4 (E2) 0 $\mu$ M            | 13877        | 1.3 | 2836         | 1.2 | 7879   | 9.1 | 3371  | 5.5 | 22248      | 1.5 |
| ZR/BCAR4 (E2) 0.01 $\mu$ M         | 10467        | 1.0 | 2096         | 0.9 | 1211   | 1.4 | 901   | 1.5 | 17588      | 1.2 |
| ZR/BCAR4 (E2) 0.1 $\mu$ M          | 11026        | 1.0 | 2387         | 1.0 | 2267   | 2.6 | 1057  | 1.7 | 14988      | 1.0 |
| ZR/BCAR4 (4-OHT) 0 $\mu$ M         | 11755        | 1.1 | 1400         | 0.6 | 8095   | 9.4 | 2654  | 4.3 | 21015      | 1.4 |
| ZR/BCAR4 (4-OHT) 0.01 $\mu$ M      | 13386        | 1.3 | 1547         | 0.7 | 8317   | 9.7 | 2692  | 4.4 | 21699      | 1.4 |
| ZR/BCAR4 (4-OHT) 0.1 $\mu$ M       | 11897        | 1.1 | 1570         | 0.7 | 5699   | 6.6 | 1823  | 3.0 | 22925      | 1.5 |
| ZR/BCAR3 (E2) 0 $\mu$ M            | 13507        | 1.3 | 2411         | 1.0 | 2231   | 2.6 | 761   | 1.2 | 18732      | 1.2 |
| ZR/BCAR3 (E2) 0.01 $\mu$ M         | 13780        | 1.3 | 2226         | 1.0 | 1713   | 2.0 | 611   | 1.0 | 17292      | 1.1 |
| ZR/BCAR3 (E2) 0.1 $\mu$ M          | 12357        | 1.2 | 1438         | 0.6 | 1491   | 1.7 | 465   | 0.8 | 15398      | 1.0 |
| ZR/BCAR3 (4-OHT) 0 $\mu$ M         | 11743        | 1.1 | 1533         | 0.7 | 2305   | 2.7 | 640   | 1.0 | 19871      | 1.3 |
| ZR/BCAR3 (4-OHT) 0.01 $\mu$ M      | 11373        | 1.1 | 1163         | 0.5 | 2150   | 2.5 | 572   | 0.9 | 17872      | 1.2 |
| ZR/BCAR3 (4-OHT) 0.1 $\mu$ M       | 12721        | 1.2 | 1310         | 0.6 | 2550   | 3.0 | 513   | 0.8 | 19910      | 1.3 |
| ZR/EGFR (E2) 0 $\mu$ M             | 13413        | 1.3 | 1594         | 0.7 | 1577   | 1.8 | 517   | 0.8 | 15154      | 1.0 |
| ZR/EGFR (E2) 0.01 $\mu$ M          | 11092        | 1.0 | 1620         | 0.7 | 1377   | 1.6 | 516   | 0.8 | 14647      | 1.0 |
| ZR/EGFR (E2) 0.1 $\mu$ M           | 11059        | 1.0 | 1734         | 0.7 | 1258   | 1.5 | 456   | 0.7 | 13712      | 0.9 |
| ZR/EGFR (4-OHT + EGF) 0 $\mu$ M    | 19990        | 1.9 | 1377         | 0.6 | 1955   | 2.3 | 771   | 1.3 | 18920      | 1.2 |
| ZR/EGFR (4-OHT + EGF) 0.01 $\mu$ M | 18142        | 1.7 | 1268         | 0.5 | 1513   | 1.8 | 585   | 1.0 | 16059      | 1.1 |
| ZR/EGFR (4-OHT + EGF) 0.1 $\mu$ M  | 17944        | 1.7 | 1177         | 0.5 | 1711   | 2.0 | 636   | 1.0 | 16831      | 1.1 |

**Supplementary table 3**

IC<sub>50</sub> values determined for different chemotherapeutics.

Cells cultured in medium containing estradiol (E) or 4-hydroxytamoxifen (T) and increasing concentrations of the drugs; Doxorubicin (Dox); ifosfamide (I-Fos); 5-fluorouracil (5-FU); methotrexate (MTX) and paclitaxel. A WST-1 proliferation assay was performed after 5 days.

IC<sub>50</sub> values determined by the software program Phoenix WinNonLin 6.1 as described in materials and methods.

IC<sub>50</sub> values determined in two independent experiments are presented. ND = not determined

|           | Dox (nM)  |           | I-Fos (µM) |           | 5-FU (nM)   |             | MTX (nM) |         | Taxol (nM) |           |
|-----------|-----------|-----------|------------|-----------|-------------|-------------|----------|---------|------------|-----------|
|           | E         | T         | E          | T         | E           | T           | E        | T       | E          | T         |
| ZR/vector | 16 - 20   | ND        | 256 - 286  | ND        | 261 - 623   | ND          | 10 - 21  | ND      | 3.2 - 4.2  | ND        |
| ZR/BCAR4  | 44 - 55   | 15 - 31   | 299 - 396  | 235 - 356 | 358 - 673   | 314 - 2506  | 11 - 14  | 20 - 23 | 2.5 - 3.3  | 2.5 - 3.2 |
| ZR/BCAR1  | 165 - 174 | 102 - 162 | 309 - 316  | 165 - 175 | 133 - 466   | 598 - 673   | 11 - 13  | 23 - 25 | 3.1 - 4.1  | 2.9 - 3.8 |
| ZR/BCAR3  | 15 - 39   | 14 - 24   | 227 - 283  | 184 - 255 | 257 - 331   | 446 - 913   | 10 - 11  | 16 - 24 | 2.5 - 3.7  | 2.5 - 3.6 |
| ZR/EGFR   | 174 - 263 | 372 - 442 | 334 - 364  | 614 - 692 | 1124 - 2905 | 1816 - 3392 | 13 - 35  | 10 - 42 | 4.3 - 3.5  | 3.7 - 7.6 |

## Supplementary Table 4

Associations of combined mRNA levels of *BCAR4* and *ERBB2* in primary breast tumors with metastasis-free survival and overall survival.

| MFS                                  | Univariate analysis |      |             |      | Multivariate analysis |             |      |
|--------------------------------------|---------------------|------|-------------|------|-----------------------|-------------|------|
|                                      | No.                 | HR   | 95% CI      | P    | HR                    | 95% CI      | P    |
| <b><i>ERBB2</i></b>                  |                     |      |             |      |                       |             |      |
| High vs Low                          | 69/428              | 1.43 | 1.00-2.05   | .049 | 1.36                  | .93-1.98    | .110 |
| <b><i>BCAR4</i></b>                  |                     |      |             |      |                       |             |      |
| Pos vs Neg                           | 115/382             | 1.39 | 1.01 - 1.90 | .041 | 1.40                  | 1.02 - 1.93 | .038 |
| <b>Combined addition</b>             |                     |      |             |      |                       |             |      |
| <i>BCAR4</i> neg / <i>ERBB2</i> low  | 334                 | 1    |             |      | 1                     |             |      |
| <i>BCAR4</i> pos / <i>ERBB2</i> low  | 94                  | 1.33 | .93 - 1.91  | .12  | 1.35                  | .94 - 1.95  | .100 |
| <i>BCAR4</i> neg / <i>ERBB2</i> high | 48                  | 1.35 | .87 - 2.10  | .18  | 1.28                  | .81 - 2.03  | .290 |
| <i>BCAR4</i> pos / <i>ERBB2</i> high | 21                  | 2.01 | 1.13 - 3.56 | .017 | 1.95                  | 1.08 - 3.50 | .026 |
| <b>OS</b>                            |                     |      |             |      |                       |             |      |
| <b><i>ERBB2</i></b>                  |                     |      |             |      |                       |             |      |
| High vs Low                          | 69/428              | 1.48 | 1.03 - 2.11 | .032 | 1.48                  | 1.01 - 2.15 | .044 |
| <b><i>BCAR4</i></b>                  |                     |      |             |      |                       |             |      |
| Positive vs Negative                 | 115/382             | 1.55 | 1.13 - 2.11 | .006 | 1.58                  | 1.16 - 2.17 | .004 |
| <b>Combined addition</b>             |                     |      |             |      |                       |             |      |
| <i>BCAR4</i> neg / <i>ERBB2</i> low  | 334                 | 1    |             |      | 1                     |             |      |
| <i>BCAR4</i> pos / <i>ERBB2</i> low  | 94                  | 1.44 | 1.00 - 2.06 | .047 | 1.54                  | 1.07 - 2.21 | .021 |
| <i>BCAR4</i> neg / <i>ERBB2</i> high | 48                  | 1.32 | .84 - 2.08  | .220 | 1.40                  | .87 - 2.25  | .170 |
| <i>BCAR4</i> pos / <i>ERBB2</i> high | 21                  | 2.41 | 1.40 - 4.14 | .001 | 2.25                  | 1.29 - 3.91 | .004 |

To determine a possible independent relationship of the genes studied with MFS and OS, Cox multivariate regression analyses were performed, including the base model comprising the traditional prognostic factors: age, menopausal status, tumor size, grade, and *ESR1* and *PGR* mRNA levels. Abbreviations: MFS = metastases-free survival, OS = overall survival, HR = hazard ratio, CI = confidence interval, neg = negative, pos = positive.

Supplementary Table 5. Clinicopathological and biological factors of ER $\alpha$  -positive metastatic breast cancers<sup>a</sup>

| Clinicopathological factors    | No. of patients <sup>b</sup> |
|--------------------------------|------------------------------|
| Menopausal status <sup>c</sup> |                              |
| premenopausal                  | 70                           |
| postmenopausal                 | 223                          |
| Age <sup>c</sup> (years)       |                              |
| $\leq 55$                      | 107                          |
| 56-70                          | 109                          |
| $> 70$                         | 77                           |
| Tumor size                     |                              |
| $\leq 2$ cm                    | 78                           |
| $> 2$ - $\leq 5$ cm            | 169                          |
| $> 5$ cm + pT4                 | 38                           |
| Tumor grade                    |                              |
| good/moderate                  | 39                           |
| unknown                        | 94                           |
| poor                           | 160                          |
| Histological type              |                              |
| IDC                            | 163                          |
| ILC                            | 28                           |
| DCIS + IDC                     | 24                           |
| Nodal status                   |                              |
| N0                             | 115                          |
| N1-3                           | 79                           |
| N $> 3$                        | 86                           |
| DSR                            |                              |
| LRR                            | 31                           |
| bone                           | 150                          |
| viscera                        | 112                          |
| DFI                            |                              |
| $\leq 1$ yr                    | 70                           |
| $> 1$ -3 yr                    | 125                          |
| $> 3$ yr                       | 98                           |
| <i>BCAR4</i> mRNA status       |                              |
| positive                       | 78                           |
| negative                       | 215                          |
| <i>ERBB2</i> mRNA status       |                              |
| positive                       | 37                           |
| negative                       | 256                          |

<sup>a</sup>) 293 Patients with advanced metastatic disease and primary tumors positive for ER $\alpha$  protein were included in this series.

<sup>b</sup>) because of others and unknown, numbers not always add up to 293

<sup>c</sup>) age at start of first-line therapy for recurrent disease
